# Supplementary material for: From muscle to motion: GaIn nanoparticle-TPU core/shell mesh electrodes for intelligent prosthesis
Source: Royal Society of Chemistry journal article supplement (doi:10.1039/d5mh01637a), 2025-11-19
Supplement: d5mh01637a5.xlsx [file d5mh01637a5.xlsx]

## Sheet: Data
A	B
36.5104	947
37.0889	947
37.6577	947
38.2359	944.561
38.8283	937.222
53.5425	928.184
74.0178	909.676
394.36	891.169
653.26	884.414
654.398	878.451
580.029	875.292
420.777	873.035
284.594	874.483
157.717	879.07
394.394	889.339
653.101	909.652
654.216	928.339
615.883	937.513
484.288	946.687
343.26	947
192.945	947
148.47	947
133.705	947
181.321	947
220.279	947
196.859	947
175.763	947
158.7	947
141.638	947
124.575	947
108.998	947
93.7495	947
81.5618	947
70.7554	947
63.2107	947
56.3327	947
49.9487	947
45.6103	947
41.841	947
40.1347	947
38.6031	947
37.4182	947
36.632	947
36.0632	947
36	947
36	947
36	947
36	947
36	947
36.3894	947
36.9581	947
37	947
36.882	947
36.3017	947
45.7551	933.553
66.0679	917.499
322.506	903.556
654.661	890.713
654.432	882.492
629.488	879.332
527.68	877.841
393.487	881.052
224.565	885.849
366.953	908.419
627.817	930.99
653.472	939.168
623.615	945.131
417.301	947
248.839	947
152.499	947
124.126	947
137.207	947
162.124	947
187.444	947
171.273	947
154.664	947
136.672	947
119.913	947
104.3	947
91.9193	947
80.7672	947
71.8934	947
63.5503	947
56.5859	947
50.5168	947
45.398	947
42.3125	947
39.9956	947
38.8581	947
37.8545	947
37.262	947
38.2689	947
40.5439	947
111.886	947
200.165	947
226.93	947
245.701	947
234.894	947
221.903	947
206.29	947
181.069	947
150.925	947
131.385	947
113.717	947
102.007	947
90.3297	947
78.7224	947
70.5575	947
64.7538	946.895
57.0717	941.027
56.5588	935.159
115.176	917.803
262.243	897.621
548.328	885.718
644.506	878.837
629.45	875
437.923	875
218.817	877.395
146.272	887.944
201.083	899.015
525.507	920.683
655.32	942.35
654.183	946.381
528.655	946.84
381.978	947
470.774	947
524.205	947
490.191	947
465.967	947
451.749	947
441.841	947
433.477	947
384.292	947
336.028	947
299.784	947
262.112	947
222.522	947
196.702	947
178.858	947
156.992	947
134.941	947
117.31	947
101.49	947
88.9118	947
78.3861	947
69.6806	947
59.8726	947
50.3781	947
45.1548	947
41.099	947
38.824	947
37.6298	947
37.0495	947
36.4691	947
35.891	947
35.3222	947
35.2516	947
35.8319	946.667
36	946.215
36	946.24
36	946.699
36	946.845
36	946.394
36	946.059
36	946.517
36.4454	946.976
37	946.572
37	946.121
37	946
37	946
37.3092	946
37.8779	946
37.5533	946
37	946
37	946
37	946
37	946
37	946
37	946
37	946
37.0783	946
37.6587	946
38	946
38	946.184
37.6002	946.643
37.0198	947
37	947
37.155	947
37.7126	947
38.2756	947
38.8443	947
38.5785	947
38	947
38	947
38	947
38	947
38.3438	947
38.9241	947
38.0112	947
37	947
37	947
37	947
37	947
37	947
37	947
37	947
37	947
37	947
37	947
37	947
37	947
37	947
37.9941	947
39.2014	947
40.9425	947
157.904	947
453.09	947
571.464	947
587.958	947
459.059	947
316.299	947
247.479	947
196.475	947
182.534	947
172.445	947
165.754	947
138.902	947
104.888	947
92.5851	947
81.7774	947
71.7405	947
61.2798	947
50.2528	947
44.5941	947
41.1816	945.3
41	943.494
119.01	927.343
467.659	905.785
654	891.07
654	882.041
533.706	875.241
363.636	872.948
236.551	872.497
129.617	882.428
90.9416	892.358
212.962	915.311
545.686	939.163
654	945.693
654	946.61
472.649	947
290.011	947
188.838	947
110.131	947
77.1427	947
90.1871	947
137.777	947
140.658	947
136.151	947
137.823	947
137.842	947
133.939	947
124.704	947
110.206	947
97.925	947
86.5499	947
78.4223	947
70.4282	947
62.3031	947
55.543	947
50.3197	947
46.8313	947
43.9309	947
41.0871	947
38.8487	947
38.2799	947
37.7112	947
37.1424	947
36.5559	947
36	947
36	947
35.8073	947
35.2386	947
35.6603	940.861
36.7978	931.071
331.928	916.208
655	895.895
655	880.144
622.937	876.933
518.106	874.278
520.724	877.489
625.554	880.7
655	903.096
655	927.472
592.025	938.804
507.983	944.309
318.954	947
173.587	947
113.365	947
75.2342	947
55.5017	947
46.8539	947
42.8659	947
71.8726	947
94.4374	947
102.4	947
100.912	947
91.6265	947
82.4938	947
73.5452	947
66.7201	947
60.2802	947
54.7042	947
49.5589	947
44.8192	947
41.6477	947
38.9216	947
37.7841	947
36.8197	947
36.2393	947
36	947
36	947
36	947
36	947
36	947
36	947
36	947
36	947
36	947
36.5131	939.17
48.5236	926.08
128.614	912.03
287.636	896.435
555.287	882.811
654.65	876.942
654.093	871.074
488.429	869.641
293.903	868.265
193.233	872.008
205.112	876.974
502.874	892.847
655	916.24
655	932.974
507.507	940.197
305.707	946.09
199.961	946.549
111.715	947
81.571	947
84.6509	947
149.229	947
172.848	947
175.636	947
169.077	947
159.828	947
140.312	947
122.118	947
106.762	947
93.7584	947
82.6062	947
73.7737	947
65.7239	947
59.3398	947
53.1416	946.691
47.338	946.239
43.6415	946
41.3664	946
39.5393	946.131
37.9341	946.582
37.3653	947
36.7924	947
36.212	947
36	947
36	947
36	946.689
36	946.23
36	940.37
47.003	929.085
74.8485	915.537
317.789	896.272
649.758	878.383
654.451	872.42
627.398	866.457
487.996	863.499
347.034	860.791
203.707	860.325
124.197	860.783
80.7041	863.621
358.727	868.587
654.07	881.035
654.639	909.94
604.216	934.984
464.928	940.852
322.348	946.72
177.928	947
117.219	947
73.1898	947
58.4021	947
46.5943	947
41.8547	947
47.4185	947
59.6062	947
88.2417	947
112.983	947
106.726	947
99.0901	947
89.4213	947
80.8549	947
72.8923	947
65.4347	947
58.3224	947
53.0991	947
48.0725	947
43.3328	947
40.3313	947
38.0099	947
37.4221	947
36.8417	947
36.2614	947
36	947
36	947
36	947
36	946.817
36	946.358
37.0801	941.369
40.5623	920.27
255.227	899.495
618.403	886.651
654.499	873.808
641.843	868.897
526.998	865.286
400.469	863.409
243.491	862.492
312.077	864.722
589.631	870.59
655.134	880.927
653.762	904.779
564.467	927.596
454.608	936.311
281.193	945.026
159.575	946.401
100.993	946.852
70.5345	947
52.5432	947
45.9325	947
48.8593	947
86.0028	947
107.501	947
112.62	947
105.612	947
94.1279	947
83.7678	947
73.7501	947
65.0446	947
58.0069	947
53.2672	947
48.1732	947
42.9777	947
40.6563	947
38.6605	947
37.4756	947
36.6662	947
36.1086	947
36	947
36	947
36	947
36	947
36	947
36	946.833
36	946.381
36	942.935
40.6292	923.212
79.3048	903.488
217.283	890.673
530.669	878.034
654.327	871.166
653.212	866.12
506.682	863.738
327.141	863.287
214.527	865.508
206.47	872.388
498.656	882.329
655	905.802
655	929.275
604.954	937.112
534.138	944.451
355.539	946.356
186.472	946.808
125.046	947
79.938	947
59.6252	947
48.401	947
41.5758	947
38.9169	947
36.9067	947
36.3143	947
44.8126	947
63.5817	947
73.541	947
79.9251	947
75.5033	947
70.7733	947
65.4412	947
59.6745	947
53.5409	947
49.0189	947
45.0375	947
42.7004	947
40.5342	947
38.7931	947
37.684	946.699
37.1036	946.248
36.5233	946.207
36	946.666
36	947
36	947
36	947
36.331	947
36.8997	947
37	947
37	947
37	945.182
37.2029	942.429
37.7953	930.37
50.7749	908.251
70.2911	889.323
358.072	879.232
655	869.727
655	866.516
615.469	863.305
487.789	861.755
345.71	860.379
193.484	861.663
123.654	863.956
88.2297	871.148
409.411	882.433
653.137	897.405
653.706	919.881
611.387	939.539
523.23	943.151
369.907	946.762
